# Supplementary material for: MOZ/ENL complex is a recruiting factor of leukemic AF10 fusion proteins
Source: PubMed Central journal article supplement (PMC10082848; doi:10.1038/s41467-023-37712-5), 2023-04-08
Supplement: 41467_2023_37712_MOESM1_ESM.pdf [file 41467_2023_37712_MOESM1_ESM.pdf]

## **Supplementary Information**

### **MOZ/ENL complex is a recruiting factor of leukemic AF10 fusion proteins**

Yosuke Komata, et al.

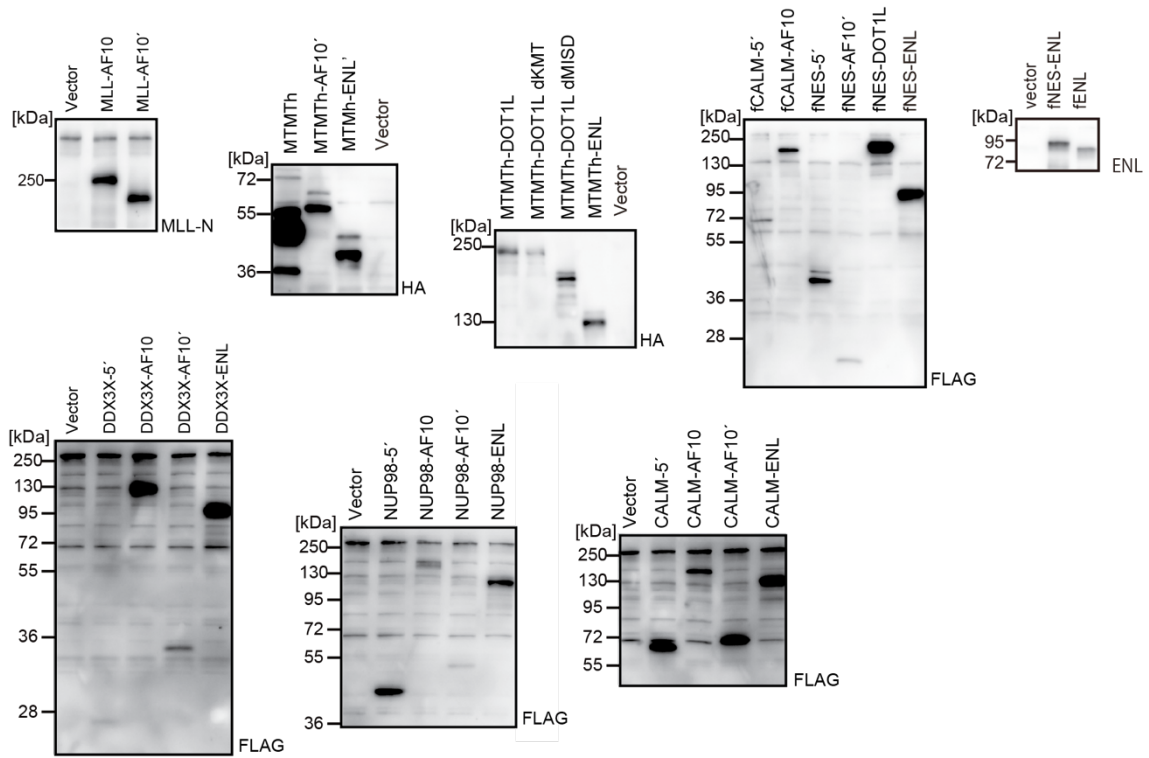

**Supplementary Fig. 1 Profiles of AF10 fusions mentioned in Fig. 1.** Protein expression of various AF10 fusion constructs. WB analysis of the whole-cell extract of virus-packaging cells with specific antibodies.

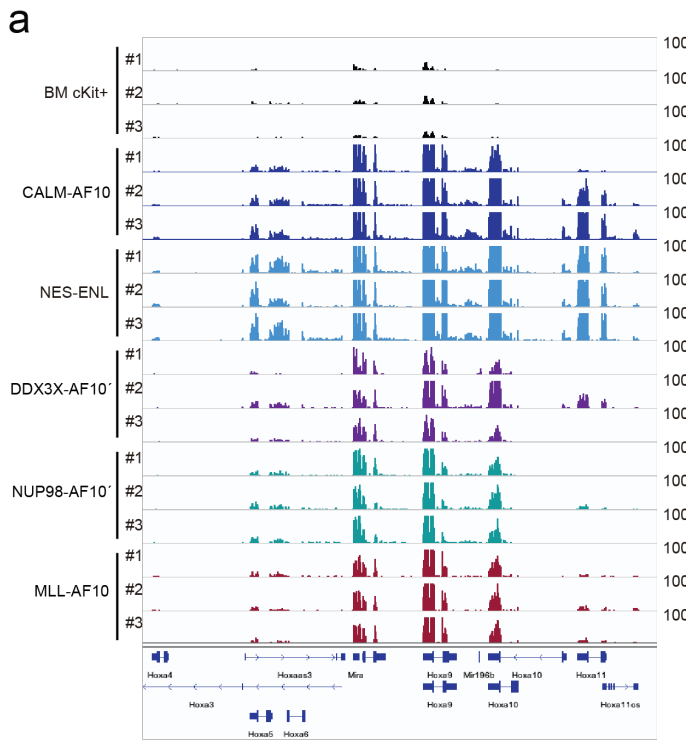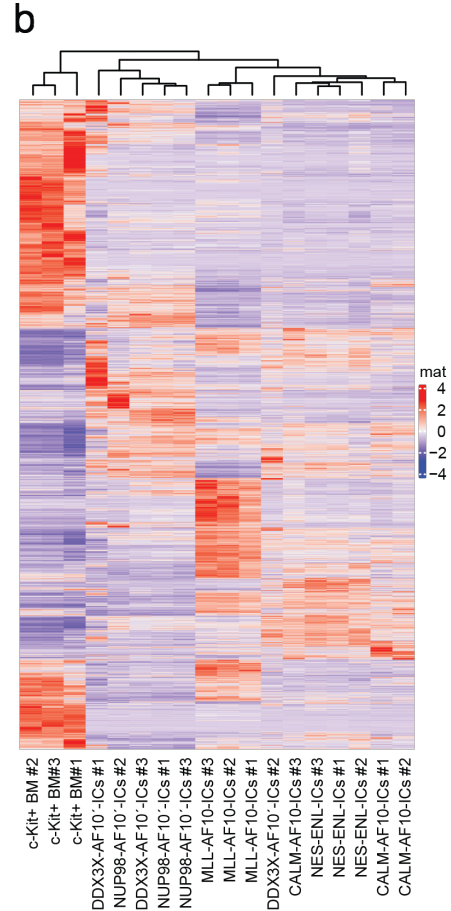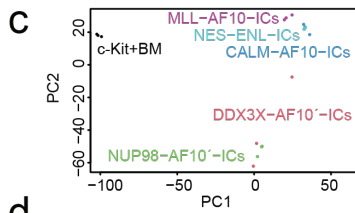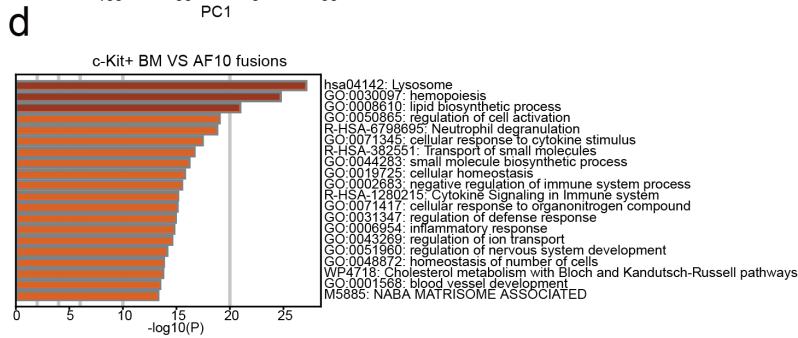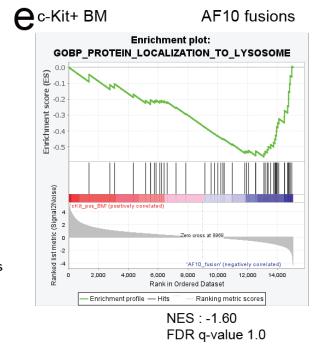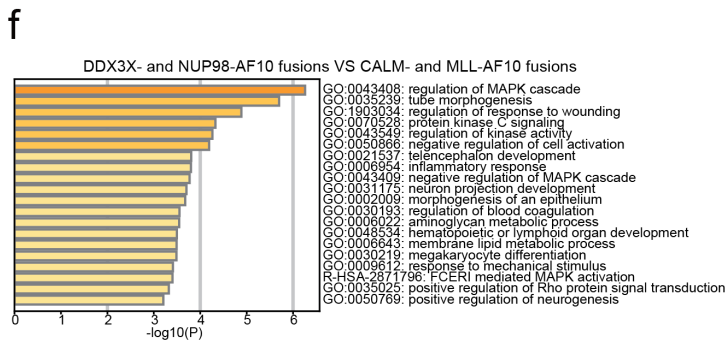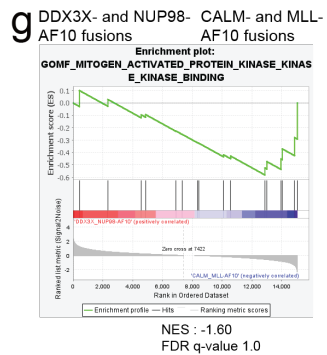

**Supplementary Fig. 2 RNA expression profiles of AF10 fusion-immortalized cells mentioned in Fig. 1. a,** RNA expression in various AF10 fusion-immortalized cells. RNA-seq analysis of the immortalized cells (ICs) for various AF10 fusions. Three independently established cell lines for each construct were analyzed using RNA-seq along with three different preparations of c-Kit-positive cells from healthy bone marrow (BM). **b,** Heatmap of RNA-seq profiles of AF10 fusion-ICs. A total of 8849 differentially expressed genes in AF10 fusion-ICs were clustered using the ComplexHeatmap R package. **c,** Principal component analysis of RNA-seq profiles of AF10 fusion-ICs using R. **d, e,** Pathways affected by the differentially expressed genes between C-Kit+ BM cells VS AF10 fusion ICs using Metascape (**d**) and GSEA (**e**). **f, g,** Pathways affected by the differentially expressed genes between DDX3X- and NUP98-AF10-ICs VS MLL- and CALM-AF10-ICs using Metascape (**f**) and GSEA (**g**).

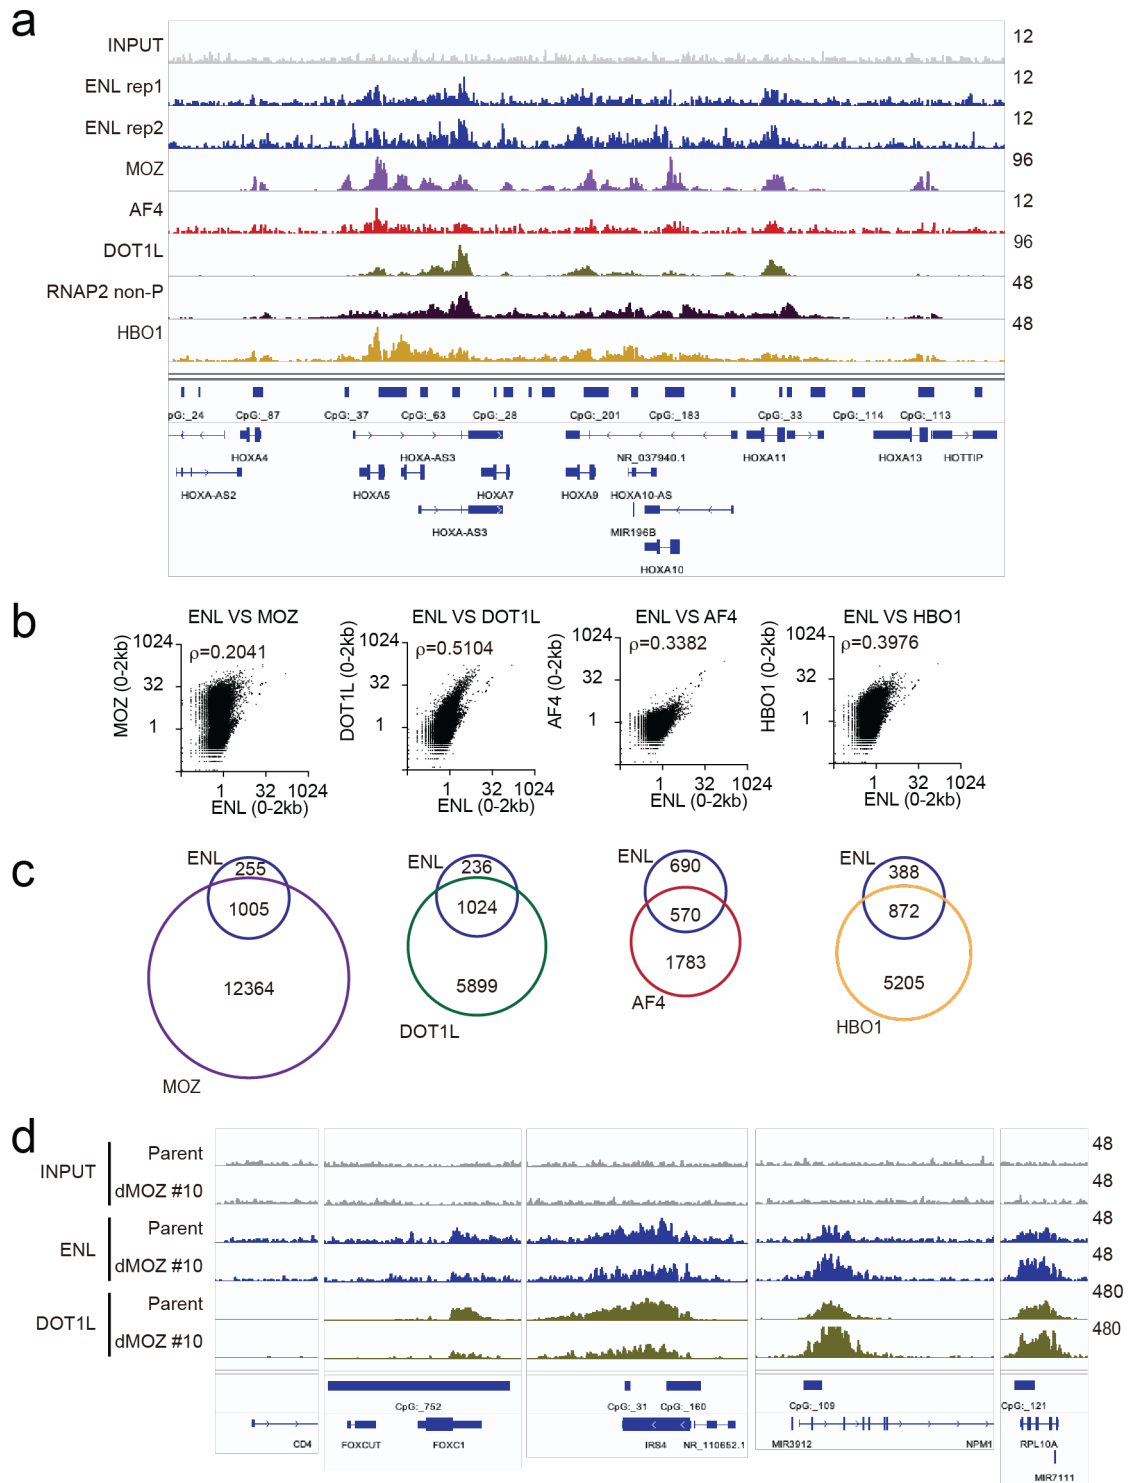

**Supplementary Fig. 3 Genomic localization profiles of various components of ENL, MYST KATs, and other ENL binders mentioned in Fig. 2. a**, ChIP-seq profiles of various ENL-associated factors at the *HOXA* locus. The data were visualized using the Integrative Genomics Viewer (Broad Institute). **b**, Correlations between ChIP signal intensities of ENL and its binding proteins. Relative occupation by multiple factors in all the TSSs. The ChIP-seq

tags of the indicated proteins (for all genes) clustered into a 2 kb bin (0 to +2 kb from the TSS) are presented as XY scatter plots with Spearman's rank correlation coefficient ( $\rho$ ). **c.** Commonalities of target genes of ENL, MOZ, DOT1L, AF4, and HBO1. Genes whose relative ratio of ChIP/INPUT signals in 2kb bins of 0 to 2kb were larger than 2 were defined as target genes. Commonalities of each target genes were depicted using Venn diagrams. **d.** Representative ChIP-seq profiles of the genes where the presence of ENL and DOT1L are dependent on MOZ (e.g., FOXC1 and IRS4) or not (e.g., NPM1 and RPL10A).

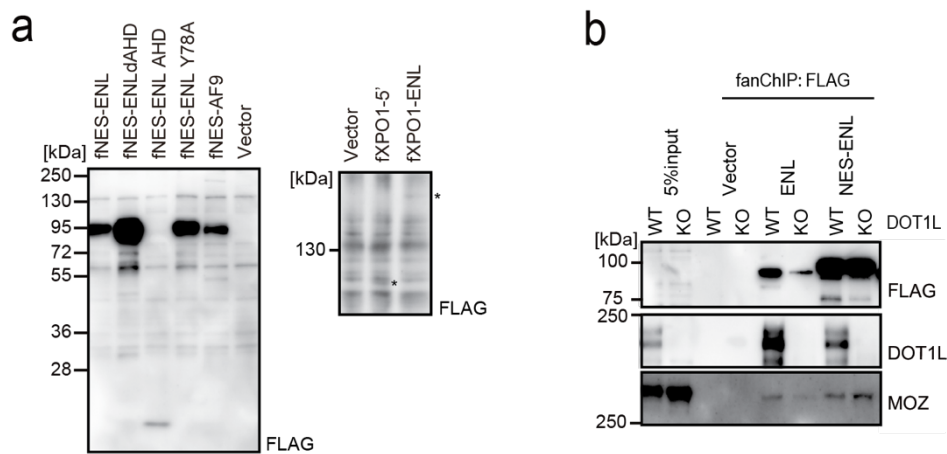

**Supplementary Fig. 4 Profiles of NES-ENL fusion proteins mentioned in Fig. 3.** **a**, Protein expression of various ENL constructs. WB of the whole cell extract of virus-packaging cells was performed using anti-FLAG antibody. \* indicates the positions of exogenously expressed proteins **b**, ENL-MOZ interaction in the absence of DOT1L. IP-WB was performed on the chromatin fraction of HEK293T cells harboring endogenous DOT1L (WT) or deficient for DOT1L (KO) that are transiently expressing various ENL constructs. The co-precipitates were immunoblotted with anti-FLAG, -DOT1L, and -MOZ antibodies.

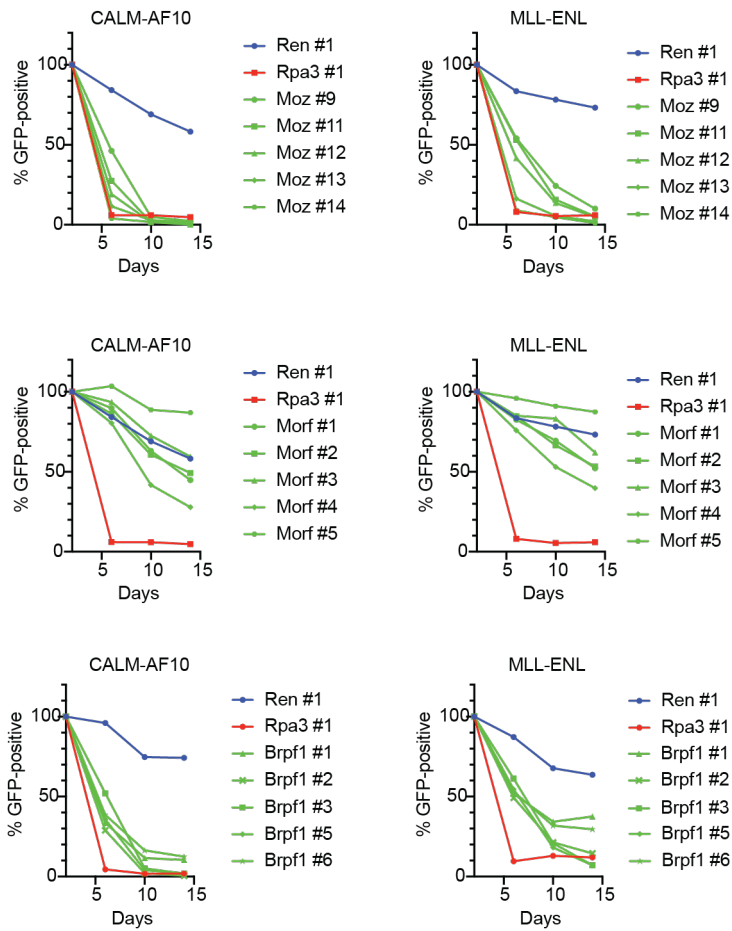

**Supplementary Fig. 5 Dependencies on MOZ, MORE, and BRPF1 of CALM-AF10- and MLL-ENL-immortalized cells. a.** Requirement of MOZ, MORF, and BRPF1 for myeloid progenitors immortalized by CALM-AF10 or MLL-ENL were analyzed using multiple different sgRNAs as in Fig.4.



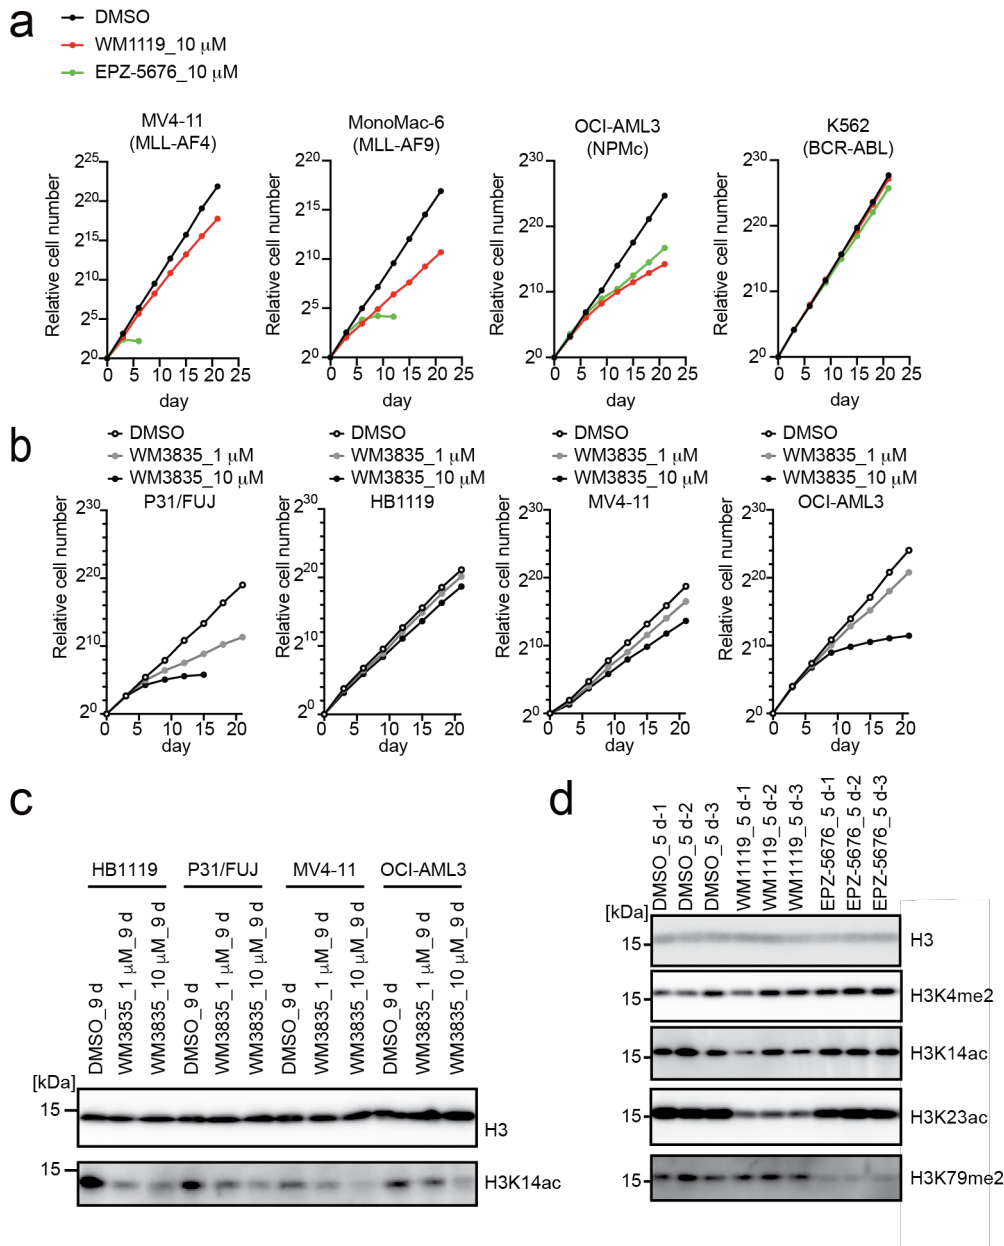

**Supplementary Fig. 6 Effects of MOZ/MORF KAT and DOT1L KMT inhibitors on various cell lines**

**mentioned in Fig. 5. a**, Effects of MOZ/MORF KAT and DOT1L KMT inhibitors on the proliferation of various cell lines. The proliferation of the indicated cell lines was monitored for 21 days in the presence of 10  $\mu$ M WM1119 or EPZ-5676, along with the DMSO control. **b**, Effects of a MOZ/MORF KAT inhibitor in the proliferation of various cell lines. The proliferation of the indicated cell lines in the presence of 1 or 10  $\mu$ M WM3835 was monitored for 21 days along with the DMSO control. **c**, Histone acetylation of various leukemia cell lines treated with MOZ/MORF KAT inhibitor. WB of the whole cell extract of various leukemia cells 9 days after treatment with 1 or 10  $\mu$ M WM3835 using antibodies specific to histone H3 and H3K14ac marks. **d**, Histone modifications in HEK293T cells after treatment with MOZ/MORF KAT and DOT1L KMT inhibitors. WB of the whole-cell extracts of the HEK293T

cells treated with 10  $\mu$ M WM1119 or EPZ-5676 for 5 days (three biological replicates) using antibodies specific to each histone modification.

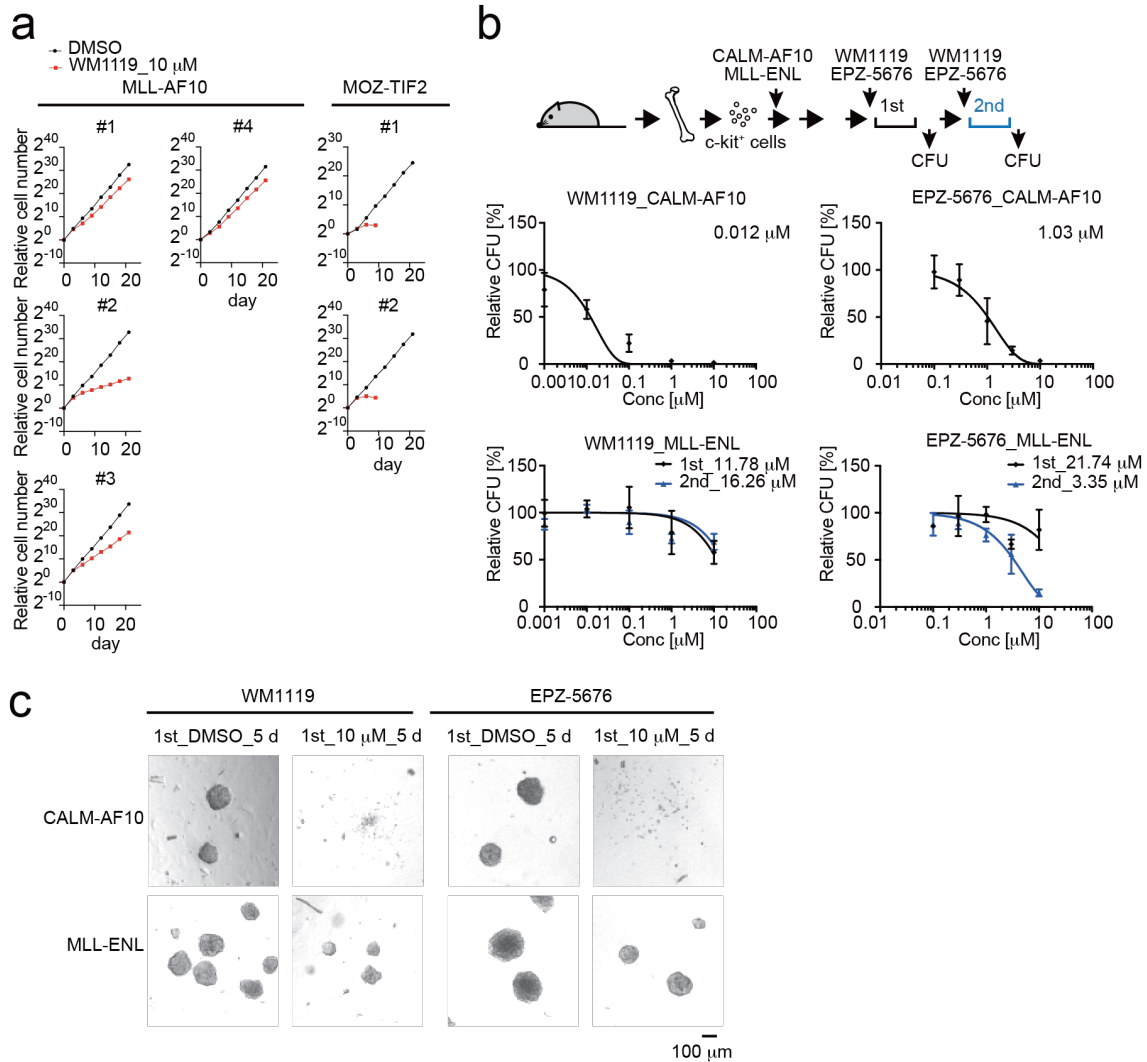

**Supplementary Fig. 7 Effects of MOZ/MORF inhibition on murine immortalized cells mentioned in Fig. 6. a,** Proliferation of MLL-AF10- and MOZ-TIF2-ICs in the presence of MOZ/MORF KAT inhibitors (10  $\mu$ M WM-1119) was monitored for 21 days along with the vehicle control (DMSO) as in Fig. 6b. **b,** Effects of MOZ/MORF KAT and DOT1L KMT inhibition on the proliferation of CALM-AF10- and MLL-ENL-ICs. Cells were cultured in a semi-solid medium in the presence or absence of WM1119 or EPZ-5676 at the indicated range of doses and the resultant relative colony-forming activity was measured (mean  $\pm$  SD of technical replicates, n=3). For MLL-ENL-ICs, the analysis was extended to the second passage. **c,** Representative images of colonies.

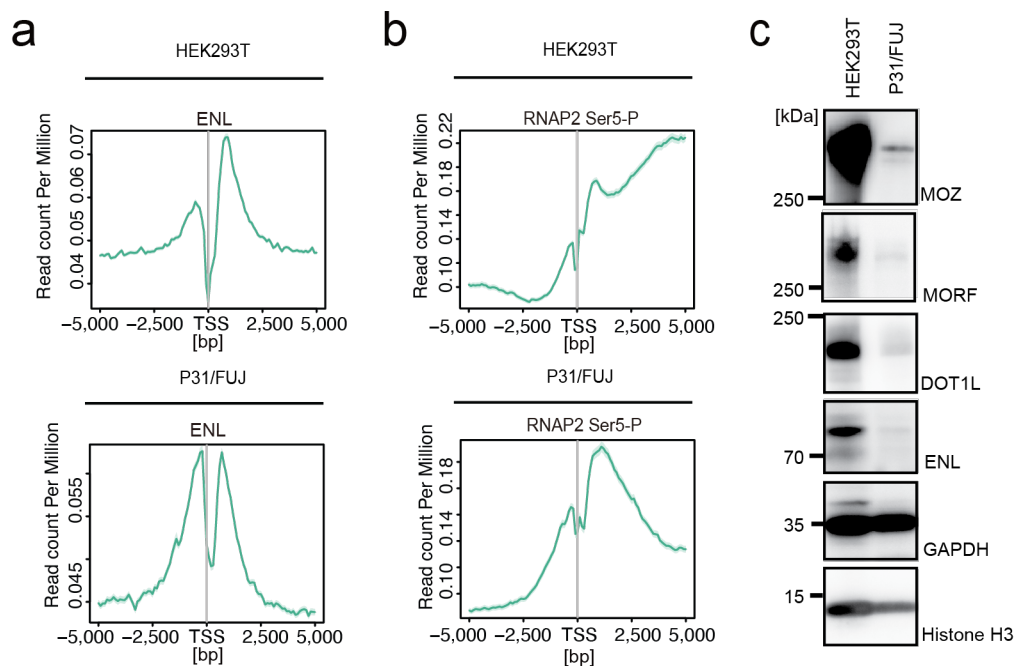

**Supplementary Fig. 8 Effects of dual inhibition with MOZ/MORF KATs and DOT1L KMT inhibitors**

mentioned in Fig. 7. **a**, Average distribution of ENL near the TSSs. The ChIP signal distribution of ENL within the 5 kb range near the TSSs was shown using the ngsplot software<sup>1</sup>. **b**, Average distribution of RNA Polymerase II with its CTD phosphorylated on Ser5 of the heptapeptide repeats (RNAP2 Ser5-P) near the TSSs is shown as in **a**. **c**, Protein expression in HEK293T and P31/FUJ cells. The whole cell extracts of HEK293T and P31/FUJ cells were analyzed by WB using indicated antibodies.

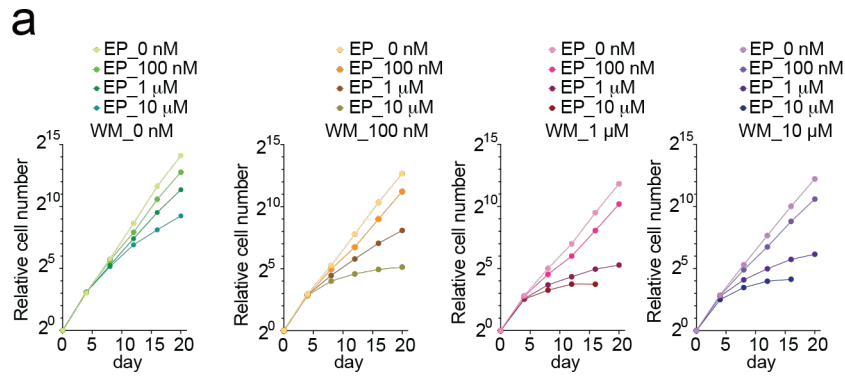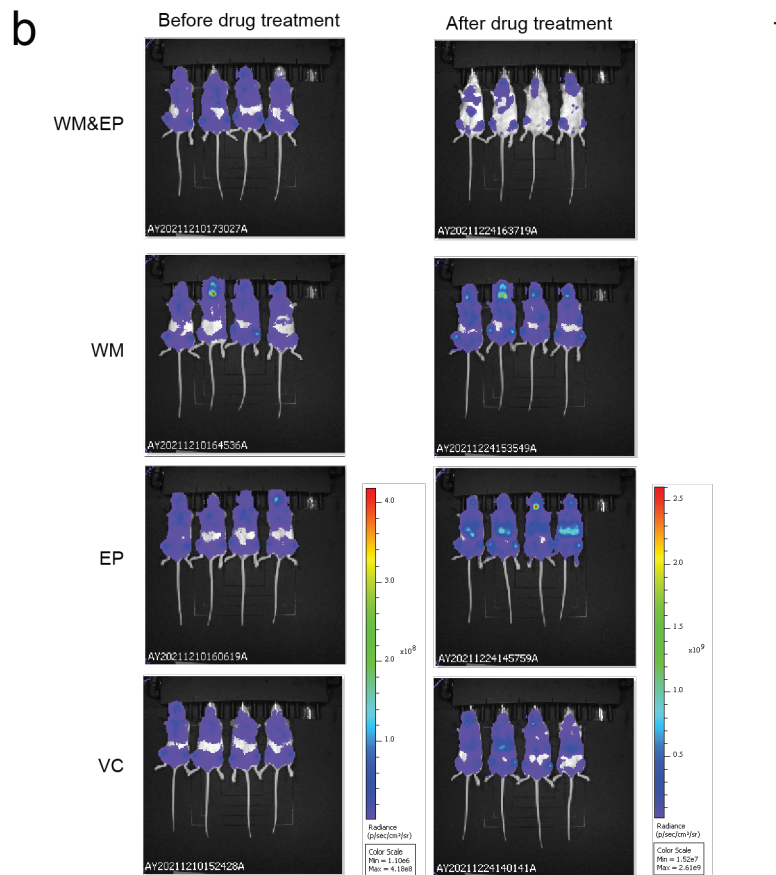

**Supplementary Fig. 9 Combinatorial effects of the inhibitors for MOZ/MORF KATs and DOT1L KMT *ex vivo* and *in vivo* mentioned in Fig. 8. a.** Effects on the proliferation of KP-Mo-TS cells, a leukemia cell line harboring CALM-AF10 fusion, by dual inhibition of MOZ/MORF KATs and DOT1L KMT. Proliferation in the presence of WM1119 and EPZ-5676 at the indicated concentrations was monitored for 21 days. **b.** Leukemia burden before and after the combination therapy with WM1119 and EPZ-5676. P31/FUJ human leukemia cells expressing LUC2Red were transplanted into sublethally irradiated SCID mice. Subsequently, the mice were administered with 35 mg/kg of WM1119 and 20 mg/kg of EPZ-5676 three times a day (i.p.) for two weeks. Representative images of luciferase-mediated bioluminescence reflecting leukemia cell abundance are shown with scale bars.

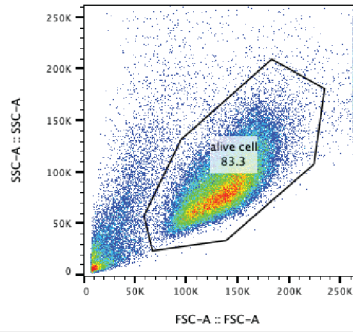

**Supplementary Fig. 10 Gating strategy for alive cells, mentioned in FACS analysis of Methods**

Alive cells were gated by the SSC/FSC profiles for the immunophenotype analysis.

**Supplementary Table 1 sgRNA sequences for mouse genes**

| <b>sgRNA</b> | <b>Sequence</b>      |
|--------------|----------------------|
| Dot11#2      | AGTGGTTATATACCTGCTGC |
| Dot11#3      | ATGAGATTATTGAGACTATC |
| Enl#1        | GAGCAGCTTGCAGCGAAACT |
| Enl#2        | GCCCGACTCCTCCACTTTGT |
| Moz#1        | CTCAATGCACTGCCACCGTA |
| Moz#2        | TGCAGCTCCTGTCGTGACCA |
| Moz#9        | GCTGTACACGGAGTGGATTT |
| Moz#11       | GTACACGGAGTGGATTTTGG |
| Moz#12       | GCTGCTCTAGCACAGTCCTG |
| Moz#13       | GATGTATCTGCTGCCTGTGG |
| Moz#14       | GAGGGCTTGGCAGAGACTGG |
| Morf#e11.1   | CTTGTTAGCCAAGCTCTTCC |
| Morf#e12.1   | AGGACACATTATACTTCTGC |
| Mor #1       | ATTGTCTGGGTCCTTATATG |
| Morf#2       | AAGCGTGCTGTGAACAATGG |
| Morf#3       | TTACACAGAGTGGATTCTTG |
| Morf #4      | GCAGAAGCAGCGGCCCTCAG |
| Morf #5      | AGTGGATTCTTGAAGCAGTG |
| Hbo1#6       | AGCCCGCGCAATGCCGCGA  |
| Hbo1#8       | CCTCTCAGCTGACGAATGCA |
| Rpa3         | GCTGGCGTTGACGCGCCTT  |
| Ren          | GGATGATAACTGGTCCGCG  |
| Brpf1#1      | TGTCTTGCGGACGCTAAAGG |
| Brpf1#2      | CCAACCGCCTGACCATCCAG |
| Brpf1#3      | CTGAAACGACAATCACGGAA |
| Brpf1#5      | CATCCTCCTCCGAAAAACCT |
| Brpf1#6      | CGAGCCGGTCCCTCTGTCTG |

**Supplementary Table 2 sgRNA sequences for human genes**

| <b>sgRNA</b> | <b>Sequence</b>       |
|--------------|-----------------------|
| DOT1L#2      | GACCGACGACGACCTGTTTG  |
| DOT1L#3      | CGTAGTTGTTGAGCTTCTCG  |
| ENL#2        | CTTGTACCGGAACTCCGTGG  |
| ENL#6        | GACTGGATGGTGTGTTGTCCG |
| MOZ#2        | GCAGAAACAGCGTCCTTCAG  |
| MOZ#4        | TTAGGAAGTGCTATTCGCCC  |
| MORF#1       | GTTGTCTGGGTCCTTATAGG  |
| MORF#2       | ATGCGGTCAGTACTTCCCAT  |
| MORF#3       | GGTTGTCTGGGTCCTTATAG  |
| MORF#5       | ATAGGAGGCAAGGCCTTTGT  |
| HBO1#2       | GCCGCTATGAGCTTGATACC  |
| HBO1#4       | GATCTGAGAGTGGACGTTCT  |
| RPA3#6       | GATGAATTGAGCTAGCATGC  |

**Supplementary Table 3 sgRNA sequences used to generate knockout clones for human genes**

| <b>sgRNA</b>  | <b>Sequence</b>      |
|---------------|----------------------|
| dDOT1L-Nick-F | TCTCGGGGTCGGTCACCGAG |
| dDOT1L-Nick-R | CTTCTCCCCGAGGTGTACG  |
| dMOZ-Nick-F   | GCTATTCGCCCAGGATTATC |
| dMOZ-Nick-R   | CTTCCTAAGCCTCGGAACCA |

**Supplementary Table 4 Custom qPCR probe/primer sequences**

| Target name    | Forward                               | Reverse                               | Reporter                               |
|----------------|---------------------------------------|---------------------------------------|----------------------------------------|
| CD4- pre-TSS   | TGTCCGAGCAAGGGATG<br>ATATTG           | CCAAGTCACTCTGCACTA<br>CCA             | ACTGCCACCATGCCAAT                      |
| CD4- post-TSS  | GGACTCACTGTCCCTCCT                    | CTTCAAGGCCATGAGGT                     |                                        |
| HOXA5 pre-TSS  | GAA<br>ACACGAAAGAAAAATCG              | CTCA<br>AGGCGTCTATTAAGAT              | TCAGCCTTTCCGCCCTC<br>AAGGCGAGGTCAAATTC |
| HOXA5 post-TSS | ACTACGGTTA<br>TGACCCGAAGGCCACTT       | AGCTTTTGTGT                           | CAT                                    |
| HOXA9 pre-TSS  | G<br>TGGCTGCTTTTTTATGGC               | GGCACAGCCCTCCCA<br>CCGCGTGCAGTGC      | TTGCTTCCTGGGTTTCT<br>CCCCTCACATAAAATT  |
| HOXA9 post-TSS | TTCAATT<br>AGTGGCGGCGTAAATCC          | TGATCACGTCTGTGGCTT<br>ATTTGAA         | CCCAGCCTCATC                           |
| MYC pre-TSS    | T<br>GCGGTATCTGCTGCTTTG               | GCATTATGTATGCACAG<br>CTATCTGGAT       | CTGGGTGGAAGGTATCC                      |
| MYC post-TSS   | G<br>GGGTAGGCGCAGGCA                  | GGTTTTTCCAAGTCAACG<br>ATTCCA          | ATGTGTCCGATTCTCC                       |
| MYB pre-TSS    | GGGCCCCGGGTGTGT                       | GCCGCCACCGTCGTATT<br>CTGAAGGAGGGTGCAG | TCACATGTCCTTCACTCT<br>C                |
| MYB post-TSS   | CCCCCAGGCGAAAGGT<br>CGGCGTTGATTCCAATT | AAG<br>CACACAAACGCAGGCAG              | CAGCCGCATCCACG                         |
| MEIS1 pre-TSS  | TATTTCA                               | TAG                                   | CCGCCAGCTTATTTTT                       |
| MEIS1 post-TSS | TCTCAGCGCCTCCAAATC<br>TTG             | TTTGTGTGTGTGAAATTT<br>AGCTATTTAGGTTTT | CCAGGCAGTTATTTTC                       |

**Supplementary Table 5 Accession numbers of the NGS data**

| Sample name              | DRA accession number | Sample ID    | GEA accession number |
|--------------------------|----------------------|--------------|----------------------|
| cKit+BM-0226-1-RNA       | DRA013593            | SAMD00446086 | E-GEAD-486           |
| cKit+BM-0226-2-RNA       | DRA013593            | SAMD00446087 | E-GEAD-486           |
| cKit+BM-0225-RNA         | DRA013593            | SAMD00446088 | E-GEAD-486           |
| CALM-AF10-Ics-0131-RNA   | DRA013593            | SAMD00446089 | E-GEAD-486           |
| CALM-AF10-Ics-0820-RNA   | DRA013593            | SAMD00446090 | E-GEAD-486           |
| CALM-AF10-Ics-1223-RNA   | DRA013593            | SAMD00446091 | E-GEAD-486           |
| NES-ENL-Ics-0127-RNA     | DRA013593            | SAMD00446092 | E-GEAD-486           |
| NES-ENL-Ics-0203-RNA     | DRA013593            | SAMD00446093 | E-GEAD-486           |
| NES-ENL-Ics-0210-RNA     | DRA013593            | SAMD00446094 | E-GEAD-486           |
| DDX3X-AF10'-Ics-0106-RNA | DRA013593            | SAMD00446095 | E-GEAD-486           |
| DDX3X-AF10'-Ics-0127-RNA | DRA013593            | SAMD00446096 | E-GEAD-486           |
| DDX3X-AF10'-Ics-1230-RNA | DRA013593            | SAMD00446097 | E-GEAD-486           |
| NUP98-AF10'-Ics-0106-RNA | DRA013593            | SAMD00446098 | E-GEAD-486           |
| NUP98-AF10'-Ics-1028-RNA | DRA013593            | SAMD00446099 | E-GEAD-486           |
| NUP98-AF10'-Ics-1230-RNA | DRA013593            | SAMD00446100 | E-GEAD-486           |
| MLL-AF10-Ics-0210-1-RNA  | DRA013593            | SAMD00446101 | E-GEAD-486           |
| MLL-AF10-Ics-0210-2-RNA  | DRA013593            | SAMD00446102 | E-GEAD-486           |
| MLL-AF10-Ics-0210-3-RNA  | DRA013593            | SAMD00446103 | E-GEAD-486           |



|                                                   |           |              |            |
|---------------------------------------------------|-----------|--------------|------------|
| 293T-fanChIP-INPUT(T0226_IN)                      | DRA004872 | SAMD00055699 | E-GEAD-320 |
| 293T-fanChIP-ENL rep1<br>(T0127_ENLx5)            | DRA010819 | SAMD00247200 | E-GEAD-402 |
| 293T-fanChIP-MOZ (T1117_MYST3)                    | DRA008732 | SAMD00180127 | E-GEAD-322 |
| 293T-fanChIP-DOT1L (T0713_DOT1L)                  | DRA004872 | SAMD00055697 | E-GEAD-320 |
| 293T-fanChIP-AF4 (T1117_AF4)                      | DRA004872 | SAMD00055708 | E-GEAD-320 |
| 293T-fanChIP-RNAP2 non-P (T0329-<br>parent)       | DRA010819 | SAMD00247201 | E-GEAD-402 |
| 293T-fanChIP-RNAP2 Ser5-<br>P(T0226_RNAP2 Ser5-P) | DRA004872 | SAMD00055704 | E-GEAD-320 |
| 293T-fanChIP-ENL rep 2 (T0226_ENL)                | DRA013594 | SAMD00446114 | E-GEAD-487 |
| 293Tpa-fanChIP-IN(T0725_Tpa_IN)                   | DRA426544 | SAMD00567561 | E-GEAD-585 |
| 293TdmOZ-fanChIP-<br>IN(T0715_TdmOZ_IN)           | DRA426545 | SAMD00567562 | E-GEAD-585 |
| 293Tpa-fanChIP-ENL(T0725_Tpa_ENL)                 | DRA426546 | SAMD00567563 | E-GEAD-585 |
| 293TdmOZ-fanChIP-<br>ENL(T0715_TdmOZ_ENL)         | DRA426547 | SAMD00567564 | E-GEAD-585 |
| 293Tpa-fanChIP-<br>DOT1L(T0809_Tpa_DOT1L)         | DRA426548 | SAMD00567565 | E-GEAD-585 |
| 293TdmOZ-fanChIP-<br>DOT1L(T0809_TdmOZ_DOT1L)     | DRA426549 | SAMD00567566 | E-GEAD-585 |
| P31-fanChIP-INPUT(P0224_IN)                       | DRA013594 | SAMD00446115 | E-GEAD-487 |
| P31-fanChIP-ENL(P0217_ENL)                        | DRA013594 | SAMD00446116 | E-GEAD-487 |
| P31-fanChIP-RNAP2 Ser5-<br>P(P0217_RNAP2 Ser5-P)  | DRA013594 | SAMD00446117 | E-GEAD-487 |

**Supplementary Table 6 Key resources table**

| Reagent/Resource                   | Source                    | Identifier                          |
|------------------------------------|---------------------------|-------------------------------------|
| <b>Antibodies</b>                  |                           |                                     |
| FLAG [WB 1000:1]                   | Sigma-Aldrich             | Cat#F7425; RRID:<br>AB_439687       |
| FLAG (M2) [ChIP: 1 µg/ 400 µL]     | Sigma-Aldrich             | Cat#:F3165<br>RRID:AB_259529        |
| Xpress [WB 1000:1]                 | Santa cruz Biotechnology  | Cat#sc-499; RRID:<br>AB_675764      |
| HA (3F10) [WB 1000:1]              | Roche                     | Cat#11867423001; RRID:<br>AB_390918 |
| DOT1L [ChIP: 1 µL/400 µL]          | Bethyl Laboratories       | Cat#A300-953A; RRID:<br>AB_805775   |
| DOT1L [WB 1000:1]                  | Cell Signaling Technology | Cat#77087;<br>RRID: AB_2799889      |
| MOZ [WB 1000:1, ChIP: 1 µL/400 µL] | Active motif              | Cat#39868; Discontinued             |
| MLL(N) [WB 1000:1]                 | Cell Signaling Technology | Cat# 14689<br>RRID: AB_2688009      |
| MOZ [WB 1000:1, ChIP: 1 µL/400 µL] | Cell Signaling Technology | Cat#78462                           |
| CyclinT1 [WB 1000:1]               | Bethyl Laboratories       | Cat#A303-497A; RRID:<br>AB_10952856 |
| CyclinT1 [ChIP: 1 µg/400 µL]       | Santa cruz Biotechnology  | Cat#sc-8127<br>RRID: AB_2073892     |
| ENL [WB 1000:1, ChIP:5 µg/400 µL]  | Cell Signaling Technology | Cat#:14893S                         |
| RNAP2 Ser5-P [ChIP: 1 µg/400 µL]   | Millipore                 | Cat#05-623; RRID:<br>AB_309852      |
| RNAP2 non-P [ChIP: 1 µg/400 µL]    | Abcam                     | Cat#ab817; RRID:<br>AB_306327       |

|                                                 |                           |                                  |
|-------------------------------------------------|---------------------------|----------------------------------|
| AF4 [ChIP: 1 µg/400 µL]                         | Santa cruz Biotechnology  | Cat#sc-49350; RRID: AB_2226113   |
| HBO1 [ChIP: 1 µg/400 µL]                        | Abcam                     | Cat#:70183<br>RRID:AB_1269226    |
| ING4 [ChIP: 1 µg/400 µL]                        | Abcam                     | Cat#:108621<br>RRID:AB_10860023  |
| GAPDH [WB 1000:1]                               | Cell Signaling Technology | Cat#1118                         |
| MORF [WB 1000:1]                                | Abcam                     | Cat#ab246879                     |
| Histone H3 [WB 5000:1]                          | Cell Signaling Technology | Cat#4499;<br>RRID: AB_10544537   |
| Histone H3K23ac [WB 5000:1]                     | Millipore (Upstate)       | Cat#07-355;<br>RRID: AB_310546   |
| Histone H3K79me2 [WB 1000:1]                    | Cell Signaling Technology | Cat#5427;<br>RRID: AB_10693787   |
| Histone H3K4me2 [WB 1000:1]                     | Abcam                     | Cat#ab7766<br>RRID: AB_2560996   |
| Histone H3K14ac [WB 1000:1]                     | Abcam                     | Cat#ab52946<br>RRID: AB_880442   |
| PE-conjugated Mouse/Human CD11b [FACS:100:1]    | Thermo Fisher Scientific  | Cat#12-0112-82; RRID: AB_2734869 |
| HRP-conjugated anti-rabbit IgG(H+L) [WB 5000:1] | Bethyl Laboratories       | Cat#A120-201P                    |
| HRP-conjugated anti-mouse IgG(H+L) [WB 5000:1]  | Bethyl Laboratories       | Cat#A90-516P                     |
| HRP-conjugated anti-rat IgG(H+L) [WB 5000:1]    | Bethyl Laboratories       | Cat#A110-305P                    |

---

#### Bacterial and virus strains

---

#### Chemicals, peptides, and recombinant proteins

---

|                                                        |                          |                    |
|--------------------------------------------------------|--------------------------|--------------------|
| WM1119                                                 | Enamine                  | Cat#:EN300-1719156 |
| EPZ-5676                                               | MCE                      | Cat# HY-15593      |
| MI-2-2                                                 | Calbiochem               | Cat#444825         |
| MNase                                                  | Sigma-Aldrich            | Cat#N3755-200U     |
| Protease inhibitor cocktail                            | Roche                    | Cat#11873580001    |
| Protein-G Magnetic beads                               | Thermo Fisher Scientific | Cat#1004D          |
| mGM-CSF                                                | Peptotech                | Cat#500-P65        |
| mIL3                                                   | Peptotech                | Cat#213-13         |
| mSCF                                                   | Peptotech                | Cat#250-03         |
| D-luciferin (VivoGlo Luciferin, <i>in vivo</i> grade,) | Promega                  | Cat#P1041          |

---

#### Critical commercial assays

---

|                                                     |                          |                                |
|-----------------------------------------------------|--------------------------|--------------------------------|
| RNeasy Mini Kit                                     | Qiagen                   | Cat#74106                      |
| SuperScript™ III First-Strand cDNA Synthesis System | Thermo Fisher Scientific | Cat#18080051                   |
| SureSelect Strand Specific RNA Library Prep Kit     | Agilent Technologies     | Cat#G9691A                     |
| TruSeq ChIP Sample Prep Kit SetB                    | Illumina                 | Cat#IP-202-1024                |
| FLAG M2 antibody-conjugated beads                   |                          | Cat#M8823;<br>RRID: AB_2637089 |
| c-Kit magnetic beads                                | Sigma-Aldrich            |                                |
| ECL Prime Western Blotting Detection Reagent        | Miltenyi Biotec          | Cat#130-091-224                |
| Lipofectamine 2000 transfection reagent             | GE Healthcare            | Cat# 12316992                  |
| MycAlert Mycoplasma Detection Kit                   | Thermo Fisher            | Cat#11668027                   |
| MethoCult™ H4435 Enriched                           | Lonza                    | Cat#LT07-218                   |
| Stem Cell Culture Medium                            | STEMCELL Technologies    | Cat#: 04435                    |
|                                                     | Cell Applications, INC.  | Cat#: 621-50                   |

---

#### Deposited data

---

Accession numbers of the NGS data (see Supplementary Table 5)

<https://www.ddbj.nig.ac.jp/dra/index.html>  
[https://ddbj.nig.ac.jp/public/ddbj\\_database/gea/experiment/E-GEAD-000/](https://ddbj.nig.ac.jp/public/ddbj_database/gea/experiment/E-GEAD-000/)

### Experimental models: Cell lines

|                          |                                                      |                                         |
|--------------------------|------------------------------------------------------|-----------------------------------------|
| Human: HB1119            | Laboratory of Michael Cleary (ref. <sup>2</sup> )    | RRID: CVCL_8227                         |
| Human: HEK293T           | Laboratory of Michael Cleary (ref. <sup>3</sup> )    | Authenticated by JRCB cell bank in 2019 |
| Human: HEK293T           | ATCC                                                 | Cat# CRL-3216, RRID:CVCL_0063           |
| Human: HEK293T dMOZ#10   | This paper                                           | N/A                                     |
| Human: HEK293T dMOZ#29   | This paper                                           | N/A                                     |
| Human: HEK293T dDOT1L#14 | This paper                                           | N/A                                     |
| Human: HEK293T dDOT1L#29 | This paper                                           | N/A                                     |
| Human: PLAT-E            | Laboratory of Toshio Kitamura (ref. <sup>4</sup> )   | N/A                                     |
| Human: P31/FUJ           | JCRB                                                 | Cat# JCRB0091, RRID:CVCL_1632           |
| Human: MV4-11            | ATCC                                                 | CRL-9591 RRID: CVCL_0064                |
| Human: MonoMac-6         | DSMZ                                                 | Cat# ACC-124, RRID:CVCL_1426            |
| Human: OCI-AML3          | DSMZ                                                 | Cat# ACC-582, RRID:CVCL_1844            |
| Human: K562              | Laboratory of Michael Cleary (ref. <sup>2</sup> )    | Authenticated by JRCB cell bank in 2021 |
| Human: KP-Mo-TS          | Laboratory of Issay Kitabayashi (ref. <sup>3</sup> ) | N/A                                     |
| Human: CD34+ cells       | Cell Applications INC.                               | Cat# 490L-01f                           |

### Experimental models: Organisms/strains

|                                       |                  |                         |
|---------------------------------------|------------------|-------------------------|
| Mouse: C57BL/6Jcl                     | CLEA Japan, Inc. | C57BL/6Jcl              |
| Mouse: SCID (C.B-17/Icr-scid/scidJcl) | CLEA Japan, Inc. | C.B-17/Icr-scid/scidJcl |

### Oligonucleotides

|                                                                              |                   |               |
|------------------------------------------------------------------------------|-------------------|---------------|
| Taqman probe for murine <i>Gapdh</i>                                         | Life Technologies | Mm99999915_g1 |
| Taqman probe for murine <i>Hoxa9</i>                                         | Life Technologies | Mm00439364_m1 |
| Taqman probe for human <i>GAPDH</i>                                          | Life Technologies | Hs02786624_g1 |
| Taqman probe for human <i>ACTB</i>                                           | Life Technologies | Hs03023943_g1 |
| Taqman probe for human <i>HOXA5</i>                                          | Life Technologies | Hs00430330_m1 |
| Taqman probe for human <i>HOXA9</i>                                          | Life Technologies | Hs00365956_m1 |
| Taqman probe for human <i>MYC</i>                                            | Life Technologies | Hs01570247_m1 |
| Taqman probe for human <i>MYB</i>                                            | Life Technologies | Hs00920556_m1 |
| Taqman probe for human <i>MEIS1</i>                                          | Life Technologies | Hs00180020_m1 |
| Taqman probe for human <i>ITGAM</i>                                          | Life Technologies | Hs00167304_m1 |
| sgRNA sequences used to generate knockout clones (see Supplementary Table 3) |                   |               |
| sgRNA sequences for mouse genes (see Supplementary Table 1)                  |                   |               |
| sgRNA sequences for human genes (see Supplementary Table 2)                  |                   |               |
| Custom qPCR probe/primer sequences (see Supplementary Table 4)               |                   |               |

---

**Recombinant DNA**

---

|                        |                              |                        |
|------------------------|------------------------------|------------------------|
| pCMV5                  | Laboratory of Michael Cleary | N/A                    |
| pKLV2-EF1a-Cas9Bsd-W   | ref. <sup>6</sup>            | Addgene Plasmid #68343 |
| pLKO-puro-FR-LUC       | ref. <sup>7</sup>            | N/A                    |
| pLKO5.sgRNA.EFS.GFP    | ref. <sup>8</sup>            | Addgene Plasmid #57822 |
| pMD2.G                 | ref. <sup>9</sup>            | Addgene Plasmid #12259 |
| pMDLg/pRRE             | ref. <sup>9</sup>            | Addgene Plasmid #12251 |
| pMSCV                  | Clontech                     | 634401                 |
| pRSV-rev               | ref. <sup>9</sup>            | Addgene Plasmid #12253 |
| pCDH-MSCV-MCS-EF1-Puro | System Biosciences           | Cat#CD710B-1           |

---

**Software and algorithms**

---

|                             |                        |                                                                                                                                                               |
|-----------------------------|------------------------|---------------------------------------------------------------------------------------------------------------------------------------------------------------|
| BWA                         | ref. <sup>10</sup>     | <a href="http://bio-bwa.sourceforge.net">http://bio-bwa.sourceforge.net</a>                                                                                   |
| Cutadapt                    | ref. <sup>11</sup>     | <a href="https://cutadapt.readthedocs.io/en/stable/index.html">https://cutadapt.readthedocs.io/en/stable/index.html</a>                                       |
| FlowJo                      | BD Biosciences         | N/A                                                                                                                                                           |
| GraphPad Prism 8            | GraphPad Software Inc. | N/A                                                                                                                                                           |
| Integrative Genomics Viewer | ref. <sup>12</sup>     | <a href="https://software.broadinstitute.org/software/igv/">https://software.broadinstitute.org/software/igv/</a>                                             |
| ngsplot                     | ref. <sup>1</sup>      | <a href="https://github.com/shenlab-sinai/ngsplot">https://github.com/shenlab-sinai/ngsplot</a>                                                               |
| CCTop                       | ref. <sup>13</sup>     | <a href="https://cctop.cos.uni-heidelberg.de:8043">https://cctop.cos.uni-heidelberg.de:8043</a>                                                               |
| STAR                        | ref. <sup>14</sup>     | <a href="https://github.com/alexdobin/STAR">https://github.com/alexdobin/STAR</a>                                                                             |
| featureCounts               | ref. <sup>15</sup>     | <a href="https://bioconductor.org/packages/release/bioc/html/Rsubread.html">https://bioconductor.org/packages/release/bioc/html/Rsubread.html</a>             |
| TCC R package               | refs. <sup>16,17</sup> | <a href="https://bioconductor.org/packages/release/bioc/html/TCC.html">https://bioconductor.org/packages/release/bioc/html/TCC.html</a>                       |
| ComplexHeatmap R package    | ref. <sup>18</sup>     | <a href="https://bioconductor.org/packages/release/bioc/html/ComplexHeatmap.html">https://bioconductor.org/packages/release/bioc/html/ComplexHeatmap.html</a> |
| ImageJ                      | NIH                    | <a href="https://imagej.nih.gov/ij/">https://imagej.nih.gov/ij/</a>                                                                                           |
| Metascape                   | ref. <sup>19</sup>     | <a href="https://metascape.org/gp/index.html#/main/step1">https://metascape.org/gp/index.html#/main/step1</a>                                                 |
| GSEA                        | ref. <sup>20</sup>     | <a href="https://www.gsea-msigdb.org/gsea/index.jsp">https://www.gsea-msigdb.org/gsea/index.jsp</a>                                                           |

---

**Other**

---

Uncropped scans of western blotting data in this supplementary information

## Supplementary Fig.1

a

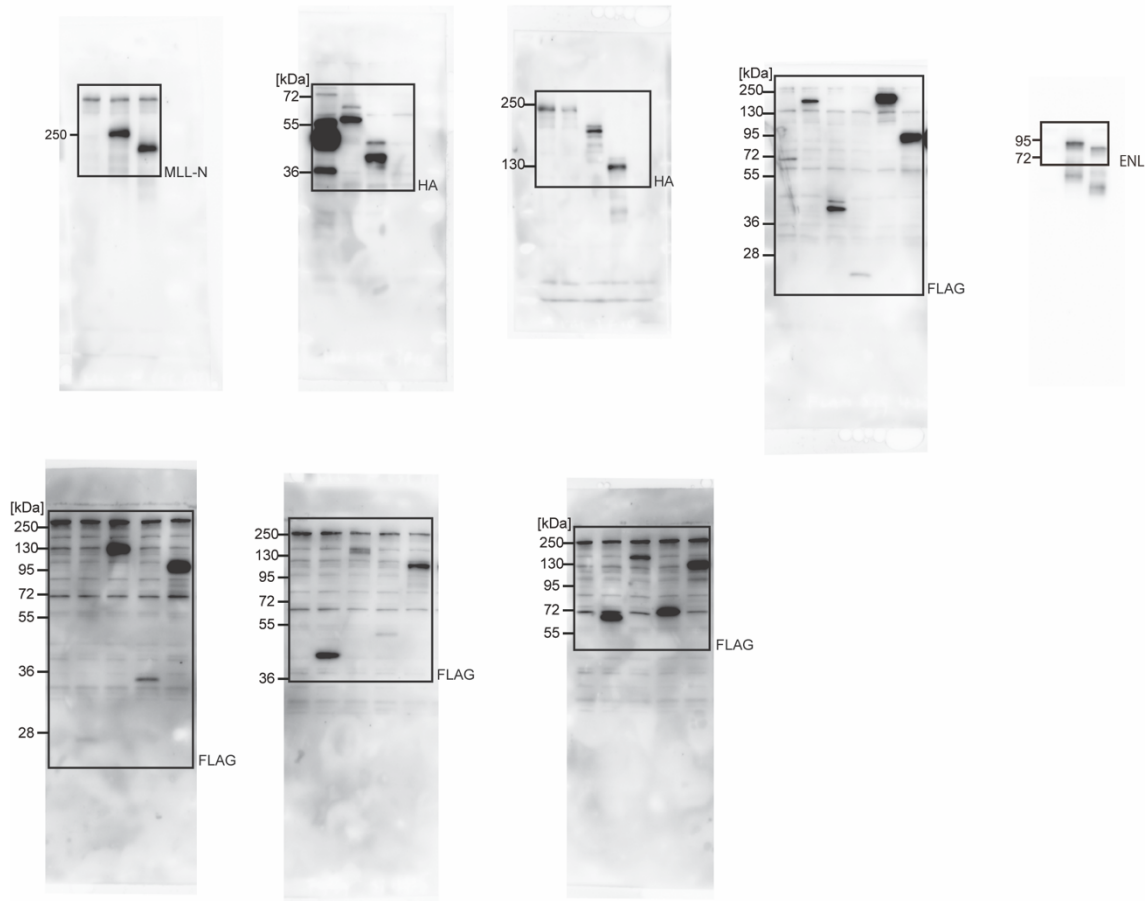

# Supplementary Fig.4

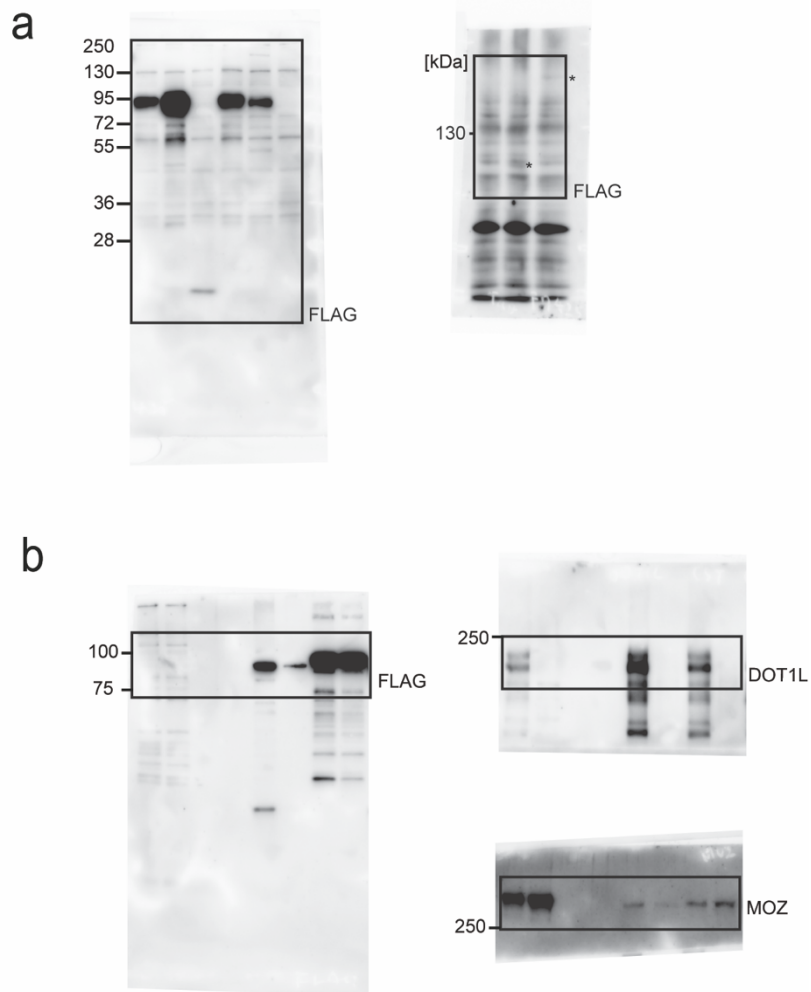

# Supplementary Fig.6

c

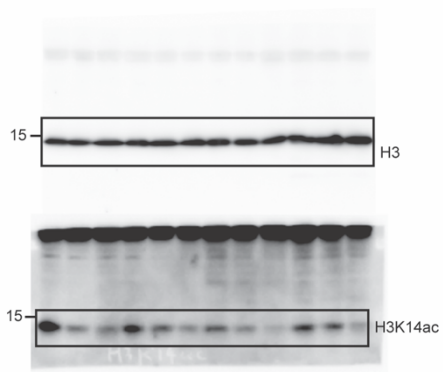

d

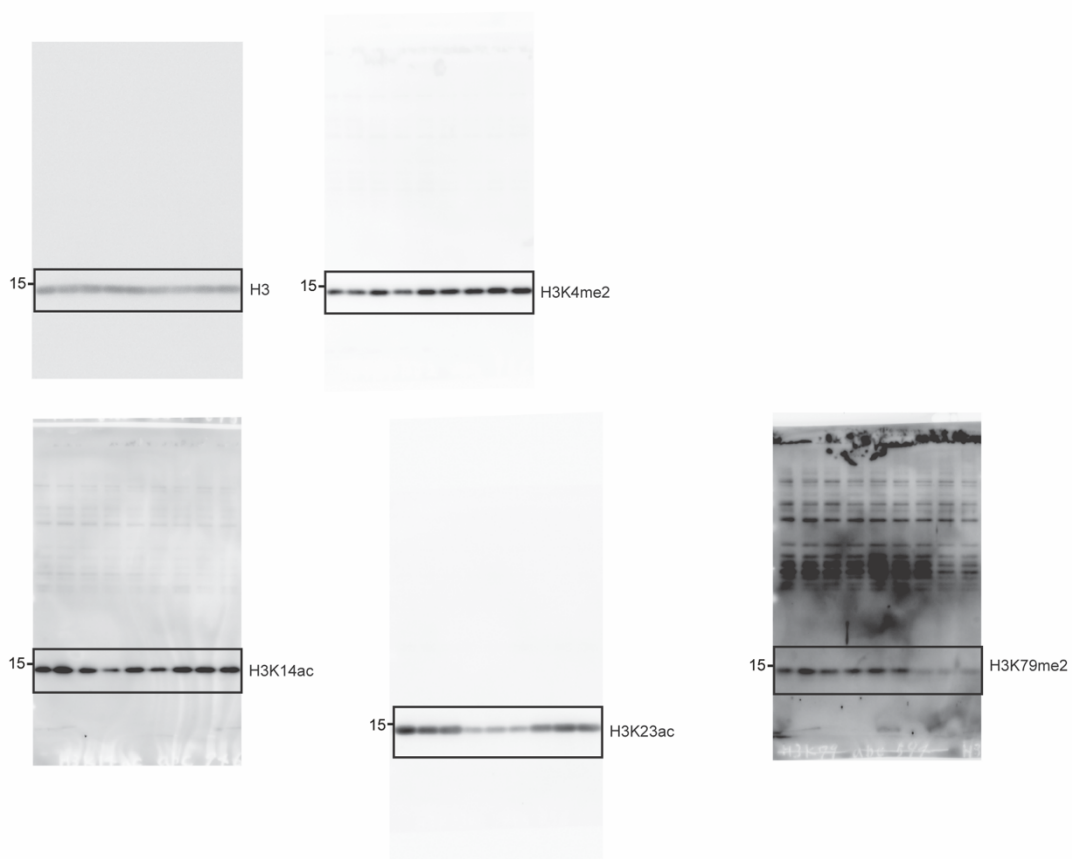

## Supplementary Fig.8

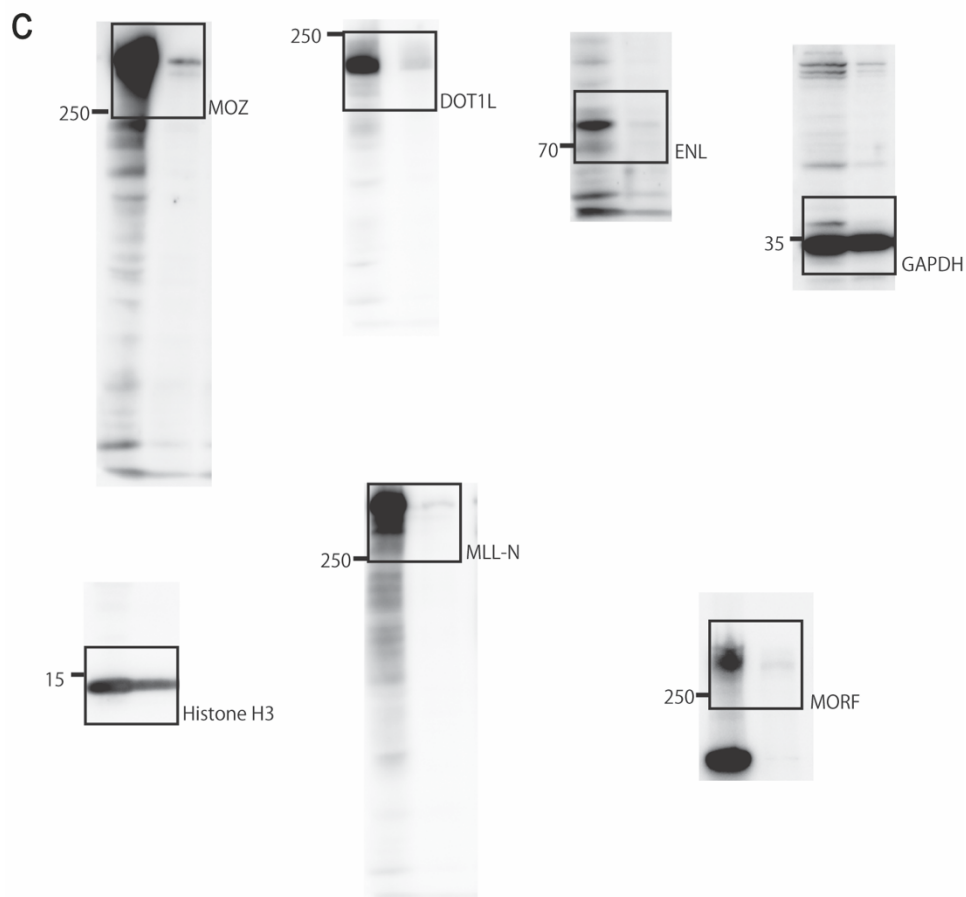



## References

1. Shen, L., Shao, N., Liu, X. & Nestler, E. ngs.plot: Quick mining and visualization of next-generation sequencing data by integrating genomic databases. *BMC Genomics* **15**, 284 (2014).
2. Tkachuk, D.C., Kohler, S. & Cleary, M.L. Involvement of a homolog of *Drosophila trithorax* by 11q23 chromosomal translocations in acute leukemias. *Cell* **71**, 691-700 (1992).
3. Yokoyama, A. *et al.* Leukemia proto-oncoprotein MLL forms a SET1-like histone methyltransferase complex with menin to regulate Hox gene expression. *Mol Cell Biol* **24**, 5639-49 (2004).
4. Morita, S., Kojima, T. & Kitamura, T. Plat-E: an efficient and stable system for transient packaging of retroviruses. *Gene Ther* **7**, 1063-6 (2000).
5. Narita, M. *et al.* Consistent detection of CALM-AF10 chimaeric transcripts in haematological malignancies with t(10;11)(p13;q14) and identification of novel transcripts. *Br J Haematol* **105**, 928-37 (1999).
6. Tzelepis, K. *et al.* A CRISPR Dropout Screen Identifies Genetic Vulnerabilities and Therapeutic Targets in Acute Myeloid Leukemia. *Cell Rep* **17**, 1193-1205 (2016).
7. Okuda, H., Kanai, A., Ito, S., Matsui, H. & Yokoyama, A. AF4 uses the SL1 components of RNAP1 machinery to initiate MLL fusion- and AEP-dependent transcription. *Nat Commun* **6**, 8869 (2015).
8. Heckl, D. *et al.* Generation of mouse models of myeloid malignancy with combinatorial genetic lesions using CRISPR-Cas9 genome editing. *Nat Biotechnol* **32**, 941-6 (2014).
9. Dull, T. *et al.* A third-generation lentivirus vector with a conditional packaging system. *J Virol* **72**, 8463-71 (1998).
10. Li, H. & Durbin, R. Fast and accurate short read alignment with Burrows-Wheeler transform. *Bioinformatics* **25**, 1754-60 (2009).
11. Martin, M. Cutadapt Removes Adapter Sequences From High-Throughput Sequencing Reads. *EMBnet Journal* **17**, 10-12 (2011).
12. Thorvaldsdottir, H., Robinson, J.T. & Mesirov, J.P. Integrative Genomics Viewer (IGV): high-performance genomics data visualization and exploration. *Brief Bioinform* **14**, 178-92 (2013).

13. Stemmer, M., Thumberger, T., Del Sol Keyer, M., Wittbrodt, J. & Mateo, J.L. CCTop: An Intuitive, Flexible and Reliable CRISPR/Cas9 Target Prediction Tool. *PLoS One* **10**, e0124633 (2015).
14. Dobin, A. *et al.* STAR: ultrafast universal RNA-seq aligner. *Bioinformatics* **29**, 15-21 (2013).
15. Liao, Y., Smyth, G.K. & Shi, W. featureCounts: an efficient general purpose program for assigning sequence reads to genomic features. *Bioinformatics* **30**, 923-30 (2014).
16. Robinson, M.D., McCarthy, D.J. & Smyth, G.K. edgeR: a Bioconductor package for differential expression analysis of digital gene expression data. *Bioinformatics* **26**, 139-40 (2010).
17. Sun, J., Nishiyama, T., Shimizu, K. & Kadota, K. TCC: an R package for comparing tag count data with robust normalization strategies. *BMC Bioinformatics* **14**, 219 (2013).
18. Gu, Z., Eils, R. & Schlesner, M. Complex heatmaps reveal patterns and correlations in multidimensional genomic data. *Bioinformatics* **32**, 2847-9 (2016).
19. Zhou, Y. *et al.* Metascape provides a biologist-oriented resource for the analysis of systems-level datasets. *Nat Commun* **10**, 1523 (2019).
20. Subramanian, A. *et al.* Gene set enrichment analysis: a knowledge-based approach for interpreting genome-wide expression profiles. *Proc Natl Acad Sci U S A* **102**, 15545-50 (2005).
